# Supplementary material for: TaSnRK2.4, an SNF1-type serine/threonine protein kinase of wheat (Triticum aestivum L.), confers enhanced multistress tolerance in Arabidopsis
Source: PubMed Central journal article supplement — J Exp Bot. 2009 Dec 18;61(3):683–96. doi: 10.1093/jxb/erp331 (PMC2814103; doi:10.1093/jxb/erp331), 2009-12-18

**TaSnRK2.4, a SNF1-type serine-threonine protein kinase of wheat (*Triticum aestivum* L.) confers enhanced multi-stress tolerance in *Arabidopsis***

Xinguo Mao<sup>1</sup> Hongying Zhang<sup>1,2</sup> Shanjun Tian<sup>1,3</sup> Xiaoping Chang<sup>1</sup> Ruilian Jing<sup>1\*</sup>

1. The National Key Facility for Crop Gene Resources and Genetic Improvement, Institute of Crop Science, Chinese Academy of Agricultural Sciences, Beijing 100081

2. College of Agronomy, Northwest A & F University, Yangling 712100, Shaanxi, China

3. College of Agronomy, Sichuan Agricultural University, Yaan 625014, Sichuan, China

## Figure Legends and Figures

### **Fig. S1 Protein abundance of TaSnRK2.4 in different transgenic Arabidopsis lines**

TaSnRK2.4 protein abundance in different transgenic Arabidopsis lines. L1 - 6, six transgenic lines; WT, wild type; GFP, *GFP* transgenic line.

### **Fig. S2 The primary root of *TaSnRK2.4* plant is much longer than that of the two controls**

As the prolonged SET for transgenic lines, the WT seeds were planted one day later than the transgenic lines, and root length of the same aged seedlings was compared on 7<sup>th</sup> day. Values are mean  $\pm$ SE, n=30 plants (F-test \*P < 0.05).

### **Fig. S3 Cell membrane stability of *TaSnRK2.4* plants under adverse stress conditions**

Comparison of CMS (%) for *TaSnRK2.4* plants and controls following PEG and high salinity stresses.

### **Fig. S4 Comparison of photosynthetic potential for *TaSnRK2.4* plants and controls under moderate drought stress**

Fv/Fm ratios for six transgenic lines were higher than the two controls; values for three lines were significantly higher. Values are mean  $\pm$  SE (n=20 plants).

Fig. S1

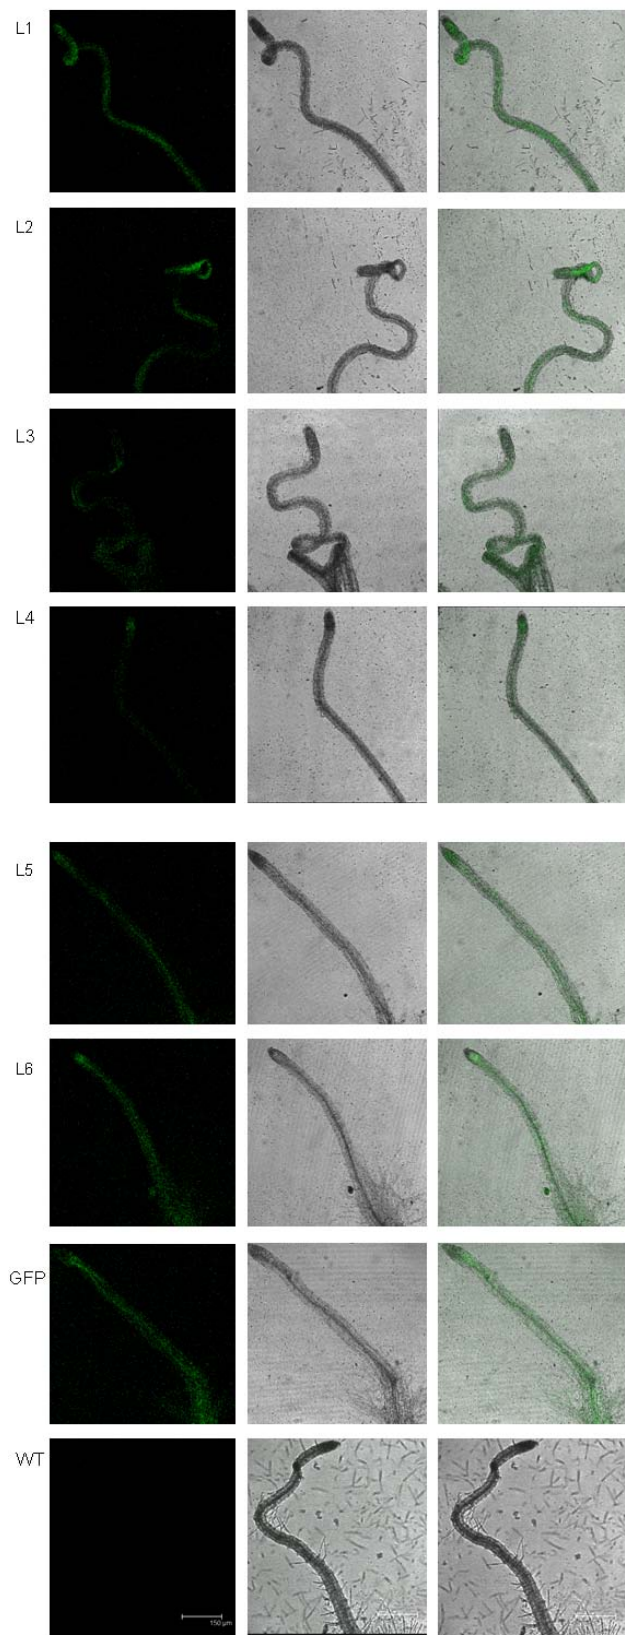

Fig. S2

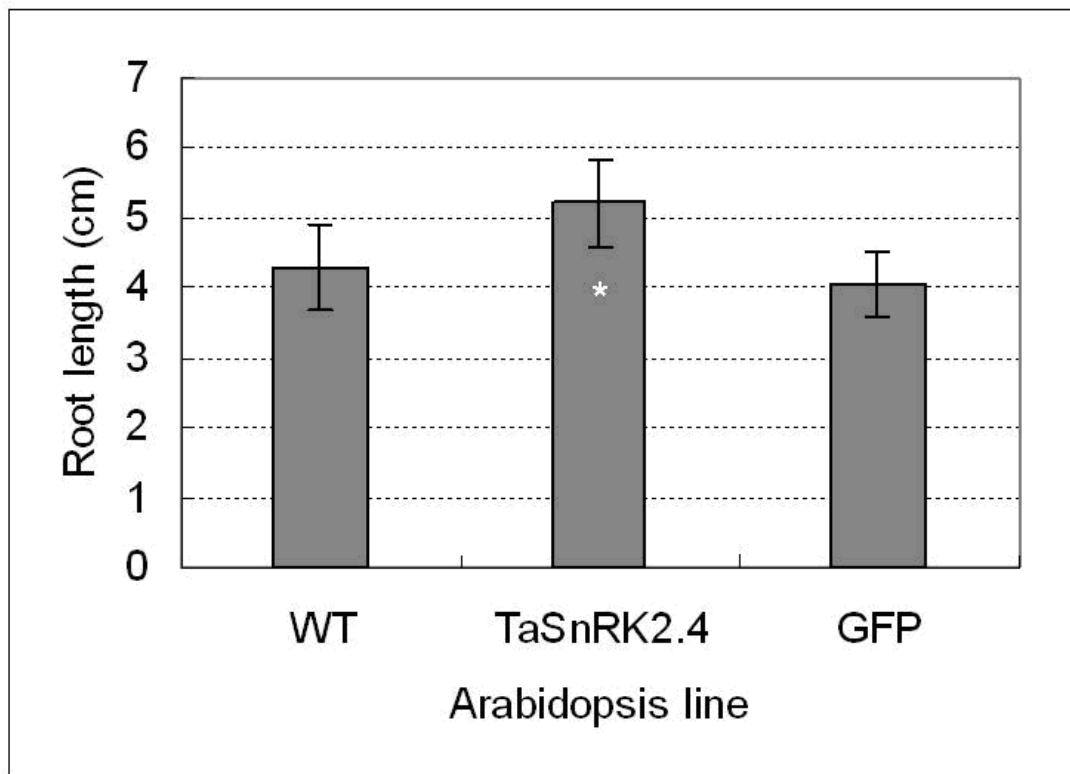

Fig. S3

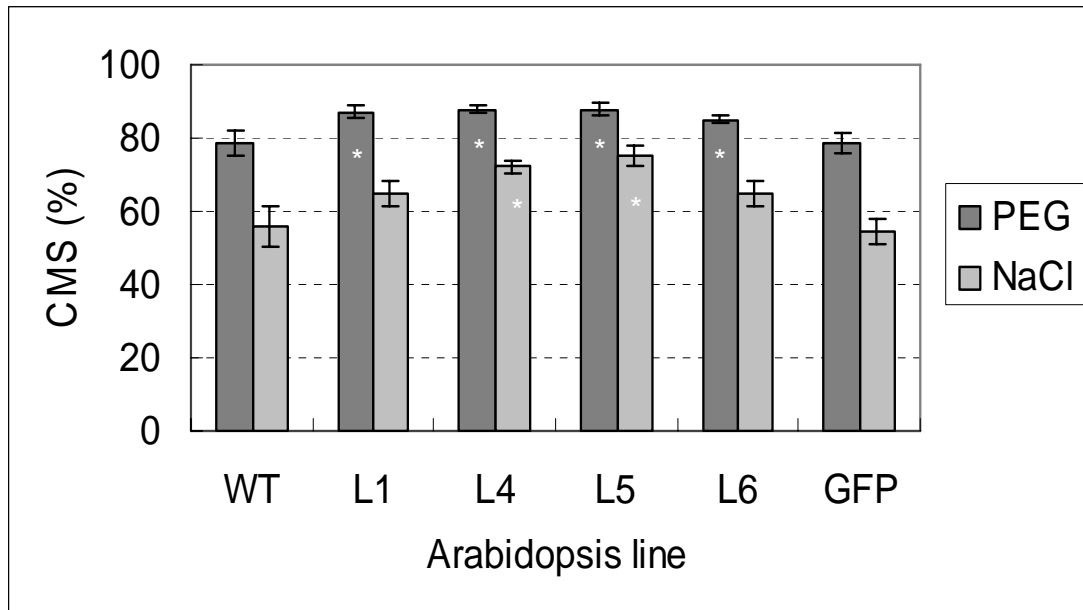

Fig. S4

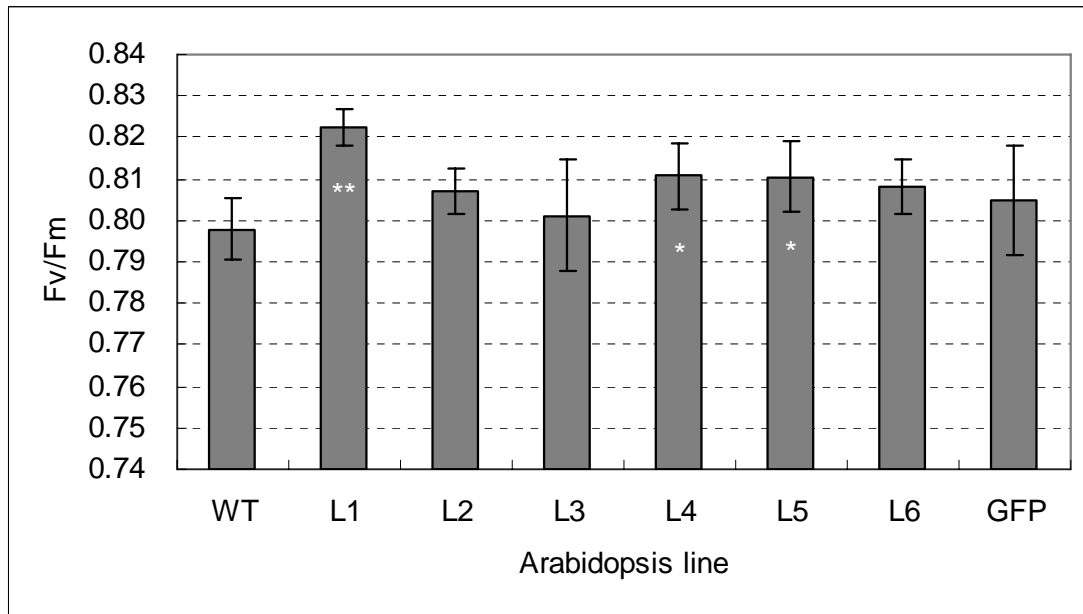

Supplement: erp331_1.pdf [file erp331_1.pdf]
